# Supplementary material for: The Immediate Effects of a Dynamic Orthosis on Gait Patterns in Children With Unilateral Spastic Cerebral Palsy: A Kinematic Analysis
Source: PubMed Central journal article supplement (PMC6393373; doi:10.3389/fped.2019.00042), 2019-02-21
Supplement: Image_1.pdf [file Image_1.pdf]

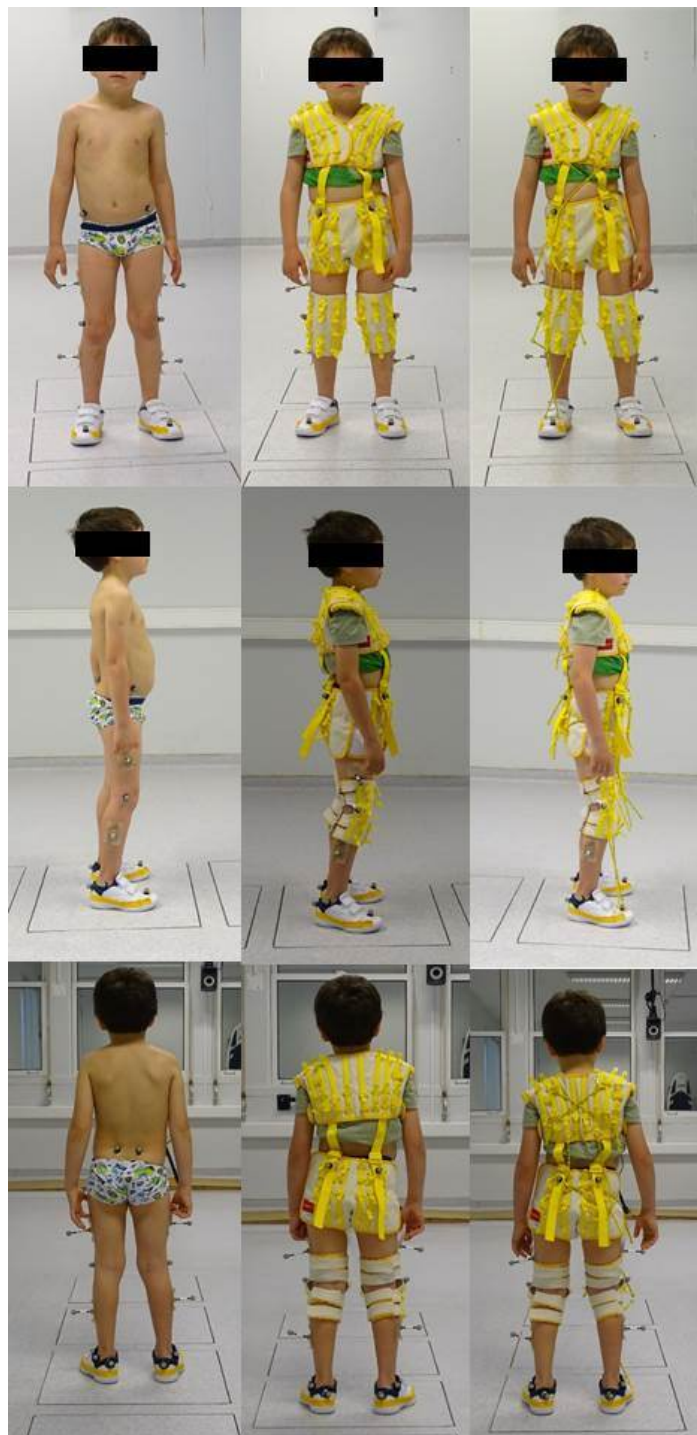

**Supplementary Figure 1.** Placement of the markers in the three conditions: Baseline (left); Therasuit without elastics (center); Therasuit (right).
